# Supplementary material for: Improved Efficiency of Perovskite Solar Cells by the Interfacial Modification of the Active Layer
Source: Nanomaterials (Basel). 2019 Feb 5;9(2):204. doi: 10.3390/nano9020204 (PMC6410319; doi:10.3390/nano9020204)
Supplement: Supplementary file 1 [file nanomaterials-09-00204-s001.pdf]

Supplementary Material:

# Improved Efficiency of Perovskite Solar Cells by the Interfacial Modification of the Active Layer

Zhen Lu<sup>1</sup>, Shangzhi Wang<sup>1</sup>, Huijun Liu<sup>1</sup>, Feng Feng<sup>1,\*</sup> and Wenhua Li<sup>2,\*</sup>

<sup>1</sup> College of Chemistry and Environmental Engineering, ShanXi DaTong University, Datong 037009, China;

<sup>2</sup> Beijing Key Laboratory of Energy Conversion and Storage Materials, College of Chemistry, Beijing Normal University, Beijing 100875, China

\* Correspondence: feng-feng64@263.net (F. F.); 11112013119@bnu.edu.cn (W. L.)

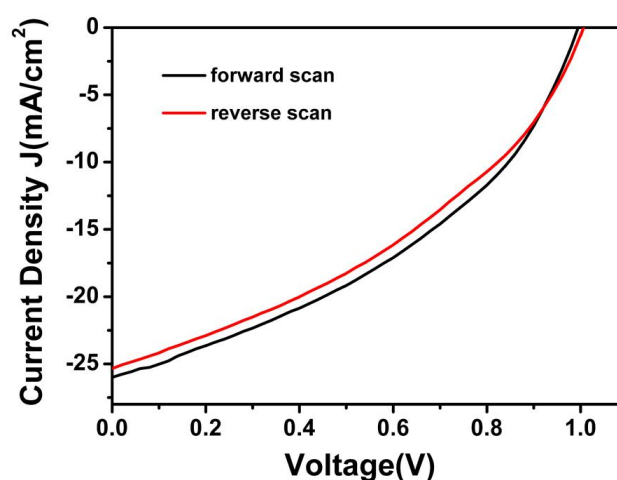

Fig S1. J-V curves of PSCs with DMSO-treated PEDOT:PSS layer (PVSK/DMSO/PVSK). The devices were scanned along the forward and reverse directions to study the hysteresis, with a delay time of 20 ms and a voltage step of 0.02 V s<sup>-1</sup>.

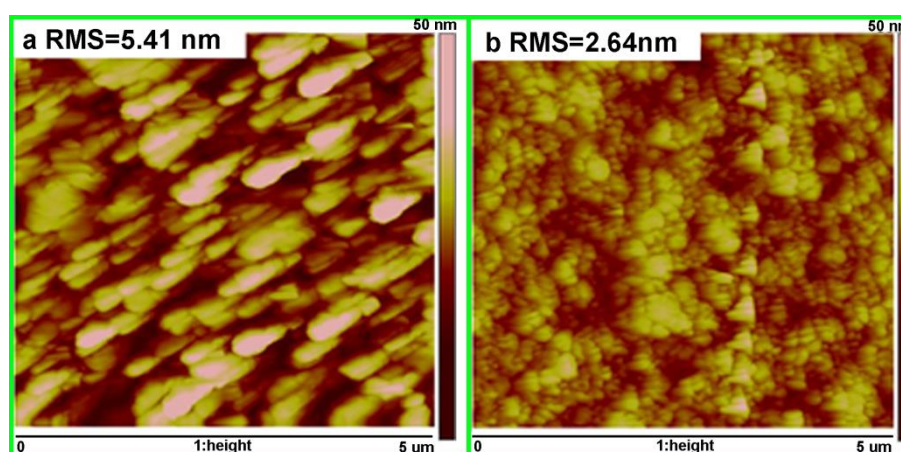

Fig S2. AFM image of (a) perovskite film processed on a pristine PEDOT:PSS film; (b) perovskite film processed on PEDOT:PSS film coated with the perovskite layer washing away by DMSO.

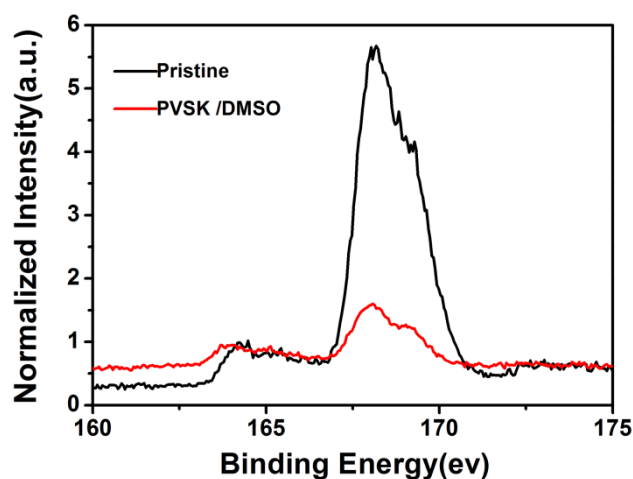

**Fig S3.** 2p XPS spectra of a pristine PEDOT:PSS film and PEDOT:PSS films treated with perovskite layer rinsed away with DMSO.

**Table S1.** Performance data of PSCs on a perovskite layer rinsed away with DMSO(PVSK/DMSO/PVSK) at the optimal conditions (annealing temperature : 50 °C, time : 5 min).

| Samples | $V_{oc}(V)$ | $J_{sc}(mA\ cm^{-2})$ | FF    | PCE(%) |
|---------|-------------|-----------------------|-------|--------|
| 1       | 0.950       | 21.6                  | 0.519 | 10.68  |
| 2       | 0.950       | 20.65                 | 0.520 | 10.25  |
| 3       | 0.957       | 21.77                 | 0.537 | 11.20  |
| 4       | 0.960       | 21.90                 | 0.539 | 11.36  |
| 5       | 0.958       | 21.80                 | 0.509 | 10.66  |
| 6       | 0.961       | 22.00                 | 0.501 | 10.66  |
| 7       | 0.950       | 21.75                 | 0.538 | 11.13  |
| 8       | 0.960       | 20.62                 | 0.525 | 10.60  |
| 9       | 0.965       | 21.40                 | 0.535 | 11.05  |
| 10      | 0.959       | 22.32                 | 0.514 | 11.03  |
| 11      | 0.977       | 22.50                 | 0.514 | 11.31  |
| 12      | 0.955       | 20.65                 | 0.530 | 10.50  |
| 13      | 0.950       | 20.50                 | 0.525 | 10.24  |
| 14      | 0.960       | 21.70                 | 0.537 | 11.21  |
| 15      | 0.970       | 21.30                 | 0.530 | 11.03  |
| 16      | 0.960       | 21.50                 | 0.539 | 11.15  |
| 17      | 0.975       | 21.40                 | 0.531 | 11.05  |
| 18      | 0.975       | 21.70                 | 0.534 | 11.32  |
| 19      | 0.970       | 21.50                 | 0.539 | 11.28  |
| 20      | 0.975       | 21.40                 | 0.538 | 11.25  |

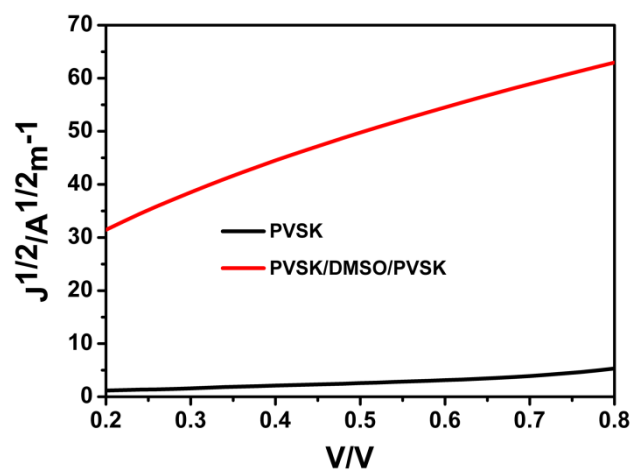

**Fig S4.** SCLC curves of devices on a pristine PEDOT:PSS film (PVSK) and PEDOT:PSS films treated with perovskite layer rinsed away with DMSO (PVSK/DMSO/PVSK).

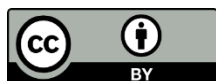

© 2019 by the authors. Submitted for possible open access publication under the terms and conditions of the Creative Commons Attribution (CC BY) license (<http://creativecommons.org/licenses/by/4.0/>).
